# Supplementary material
Source: PubMed Central journal article supplement (PMC5270591)
Supplement: NIHMS842862-supplement-01.pdf [file NIHMS842862-supplement-01.pdf]

# Supporting Information

## Cellulose Structural Polymorphism in Plant Primary Cell Walls Investigated by High-Field 2D Solid-State NMR Spectroscopy and Density Functional Theory Calculations

Tuo Wang <sup>1</sup>, Hui Yang <sup>2</sup>, James D. Kubicki <sup>3</sup>, and Mei Hong <sup>1</sup>

<sup>1</sup> Department of Chemistry, Massachusetts Institute of Technology, Cambridge, MA 02139

<sup>2</sup> Department of Geosciences, The Pennsylvania State University, University Park, PA 16802

<sup>3</sup> Department of Geological Sciences, University of Texas at El Paso, El Paso, TX 79968

**Table S1.** Structural parameters of non-equivalent glucose units used in the DFT calculation. U and D annotate the two non-equivalent glucose units within the same glucan chain in the I $\alpha$  allomorph, while C and O denote to center and origin chains of the I $\beta$  allomorph. Apostrophe denotes the atoms in the adjacent glucose residue.

|            |   | H---C distance (Å)              |                                 | H---H distance (Å)              |                                 |                                 | Torsion angles (°)                                                          |                                                                             |                                                                                  |                                                                                  |                                                                          |                                                                            |
|------------|---|---------------------------------|---------------------------------|---------------------------------|---------------------------------|---------------------------------|-----------------------------------------------------------------------------|-----------------------------------------------------------------------------|----------------------------------------------------------------------------------|----------------------------------------------------------------------------------|--------------------------------------------------------------------------|----------------------------------------------------------------------------|
|            |   | H <sub>6a</sub> -C <sub>4</sub> | H <sub>6b</sub> -C <sub>4</sub> | H <sub>6a</sub> -H <sub>4</sub> | H <sub>6b</sub> -H <sub>4</sub> | H' <sub>1</sub> -H <sub>4</sub> | $\theta$ (H <sub>6a</sub> -C <sub>6</sub> •C <sub>4</sub> -H <sub>4</sub> ) | $\theta$ (H <sub>6b</sub> -C <sub>6</sub> •C <sub>4</sub> -H <sub>4</sub> ) | X <sub>1</sub> (O <sub>5</sub> -C <sub>5</sub> -C <sub>6</sub> -O <sub>6</sub> ) | X <sub>2</sub> (C <sub>4</sub> -C <sub>5</sub> -C <sub>6</sub> -O <sub>6</sub> ) | $\Phi$ (C <sub>5</sub> -C <sub>4</sub> -O <sub>4</sub> -C <sub>1</sub> ) | $\Psi$ (C <sub>4</sub> -O <sub>4</sub> -C <sub>1</sub> '-O <sub>5</sub> ') |
| I $\beta$  | C | 2.7                             | 3.5                             | 2.4                             | 3.7                             | 2.1                             | 0.7                                                                         | 114.2                                                                       | 167.9                                                                            | -74.3                                                                            | -143.2                                                                   | -92.7                                                                      |
|            | O | 2.7                             | 3.5                             | 2.5                             | 3.7                             | 2.2                             | -6.6                                                                        | 106.7                                                                       | 165.1                                                                            | -76.4                                                                            | -145.0                                                                   | -94.2                                                                      |
| I $\beta$  | C | 2.8                             | 2.8                             | 3.0                             | 2.5                             | 2.1                             | -101.9                                                                      | 6.3                                                                         | 58.1                                                                             | 178.1                                                                            | -145.1                                                                   | -93.2                                                                      |
|            | O | 2.9                             | 2.8                             | 3.2                             | 2.6                             | 2.1                             | -110.8                                                                      | -2.2                                                                        | 52.1                                                                             | 170.4                                                                            | -150.7                                                                   | -92.2                                                                      |
| I $\beta$  | C | 3.5                             | 2.8                             | 3.7                             | 3.0                             | 2.1                             | 137.8                                                                       | -99.6                                                                       | -63.9                                                                            | 57.2                                                                             | -140.5                                                                   | -86.9                                                                      |
|            | O | 3.5                             | 2.9                             | 3.8                             | 3.3                             | 2.1                             | 115.5                                                                       | -115.9                                                                      | -67.3                                                                            | 54.0                                                                             | -155.7                                                                   | -85.4                                                                      |
| I $\alpha$ | U | 2.7                             | 3.5                             | 2.4                             | 3.6                             | 2.1                             | -3.3                                                                        | 109.3                                                                       | 165.3                                                                            | -76.8                                                                            | -143.1                                                                   | -92.6                                                                      |
|            | D | 2.7                             | 3.5                             | 2.4                             | 3.7                             | 2.2                             | -5.7                                                                        | 107.8                                                                       | 165.2                                                                            | -76.0                                                                            | -145.6                                                                   | -95.0                                                                      |
| I $\alpha$ | U | 2.8                             | 2.7                             | 3.1                             | 2.5                             | 2.2                             | -109.6                                                                      | -2.6                                                                        | 58.4                                                                             | 177.0                                                                            | -156.1                                                                   | -89.4                                                                      |
|            | D | 2.7                             | 2.9                             | 2.9                             | 2.7                             | 2.2                             | -96.1                                                                       | 12.8                                                                        | 77.2                                                                             | -163.9                                                                           | -155.9                                                                   | -85.4                                                                      |
| I $\alpha$ | U | 3.5                             | 2.8                             | 3.7                             | 3.1                             | 2.2                             | 130.4                                                                       | -107.4                                                                      | -62.7                                                                            | 57.8                                                                             | -140.0                                                                   | -81.3                                                                      |
|            | D | 3.5                             | 2.8                             | 3.8                             | 3.2                             | 2.2                             | 118.4                                                                       | -116.4                                                                      | -67.9                                                                            | 52.1                                                                             | -160.2                                                                   | -92.9                                                                      |

**Table S2.** Estimated fractions of different glucose conformations in crystalline I $\alpha$  (A and A') and I $\beta$  (B and B') allomorphs. The estimation is based on spectral deconvolution results of Kono and Numata<sup>1</sup>, with an additional assumption that A and A' have equal populations.

| Cellulose           | Organism          | A   | A'  | B   | B'  |
|---------------------|-------------------|-----|-----|-----|-----|
| I $\alpha$ dominant | <i>Cladophora</i> | 32% | 32% | 17% | 18% |
| I $\beta$ dominant  | tunicate          | 11% | 11% | 38% | 41% |

**Table S3.** <sup>13</sup>C chemical shift RMSDs (ppm) between measured primary wall cellulose and DFT calculated chemical shifts for different crystalline allomorphs, hydroxymethyl conformations, and glucose residue location. C and O denote center and origin sheets in the I $\beta$  allomorph while U and D denote the two non-equivalent glucose units in an I $\alpha$  chain. The five types of crystalline cellulose signals observed in this study are denoted as *a*, *b*, *c*, *d*, *e*.

|                         |      | <i>a</i> | <i>b</i> | <i>c</i> | <i>c</i> | <i>e</i> |
|-------------------------|------|----------|----------|----------|----------|----------|
| I $\beta$<br>allomorph  | gg_C | 5.5      | 5.3      | 5.2      | 4.7      | 5.8      |
|                         | gg_O | 4.5      | 4.5      | 4.4      | 3.8      | 4.9      |
|                         | gt_C | 4.3      | 4.0      | 3.9      | 3.6      | 4.3      |
|                         | gt_O | 2.3      | 2.5      | 2.5      | 1.9      | 2.7      |
|                         | tg_C | 2.4      | 2.6      | 2.0      | 2.1      | 2.4      |
| I $\alpha$<br>allomorph | tg_O | 1.9      | 2.3      | 2.0      | 1.8      | 2.1      |
|                         | gg_U | 5.3      | 5.2      | 5.0      | 4.5      | 5.6      |
|                         | gg_D | 5.6      | 5.5      | 5.5      | 4.9      | 6.0      |
|                         | gt_U | 4.3      | 4.3      | 4.4      | 3.6      | 4.7      |
|                         | gt_D | 4.1      | 3.8      | 3.7      | 3.5      | 4.2      |
|                         | tg_U | 2.0      | 2.2      | 1.9      | 1.7      | 2.2      |
|                         | tg_D | 2.1      | 2.5      | 2.0      | 2.2      | 1.9      |

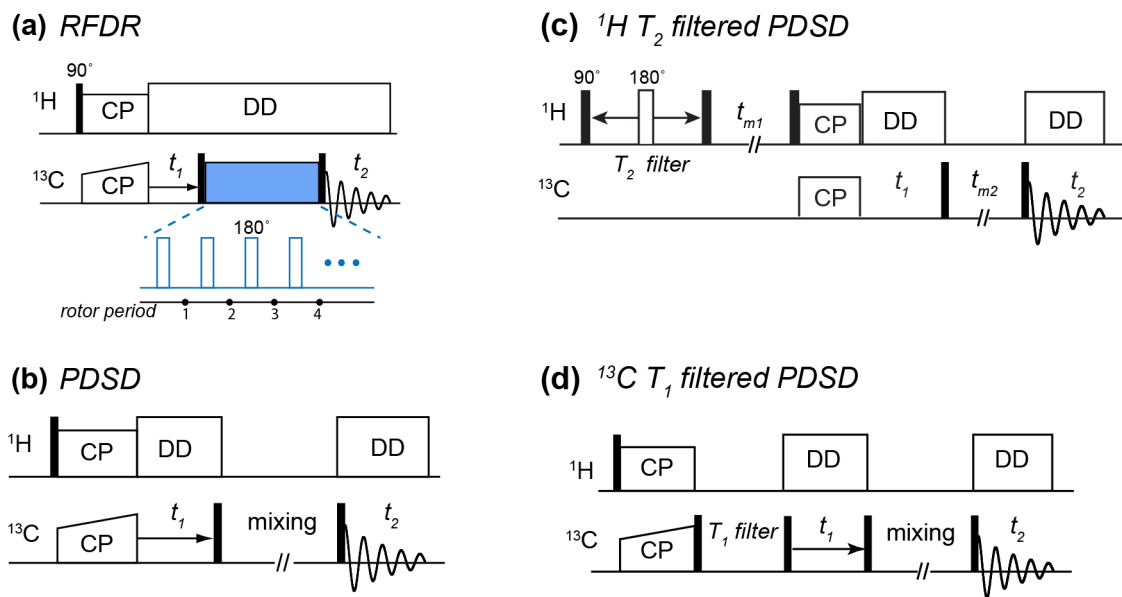

**Figure S1.** Different 2D  $^{13}\text{C}$ - $^{13}\text{C}$  correlation pulse sequences used to measure cellulose chemical shifts, structure, and dynamics. (a) Radio-frequency-driven recoupling (RFDR) experiment. (b) Proton-driven  $^{13}\text{C}$  spin diffusion (PDS) experiment. (c)  $^1\text{H}$   $T_2$  filtered PDS experiment for determining the water contact of wall polysaccharides. (d)  $^{13}\text{C}$   $T_1$  filtered PDS experiment for measuring the  $^{13}\text{C}$   $T_1$  relaxation rates of wall polysaccharides.

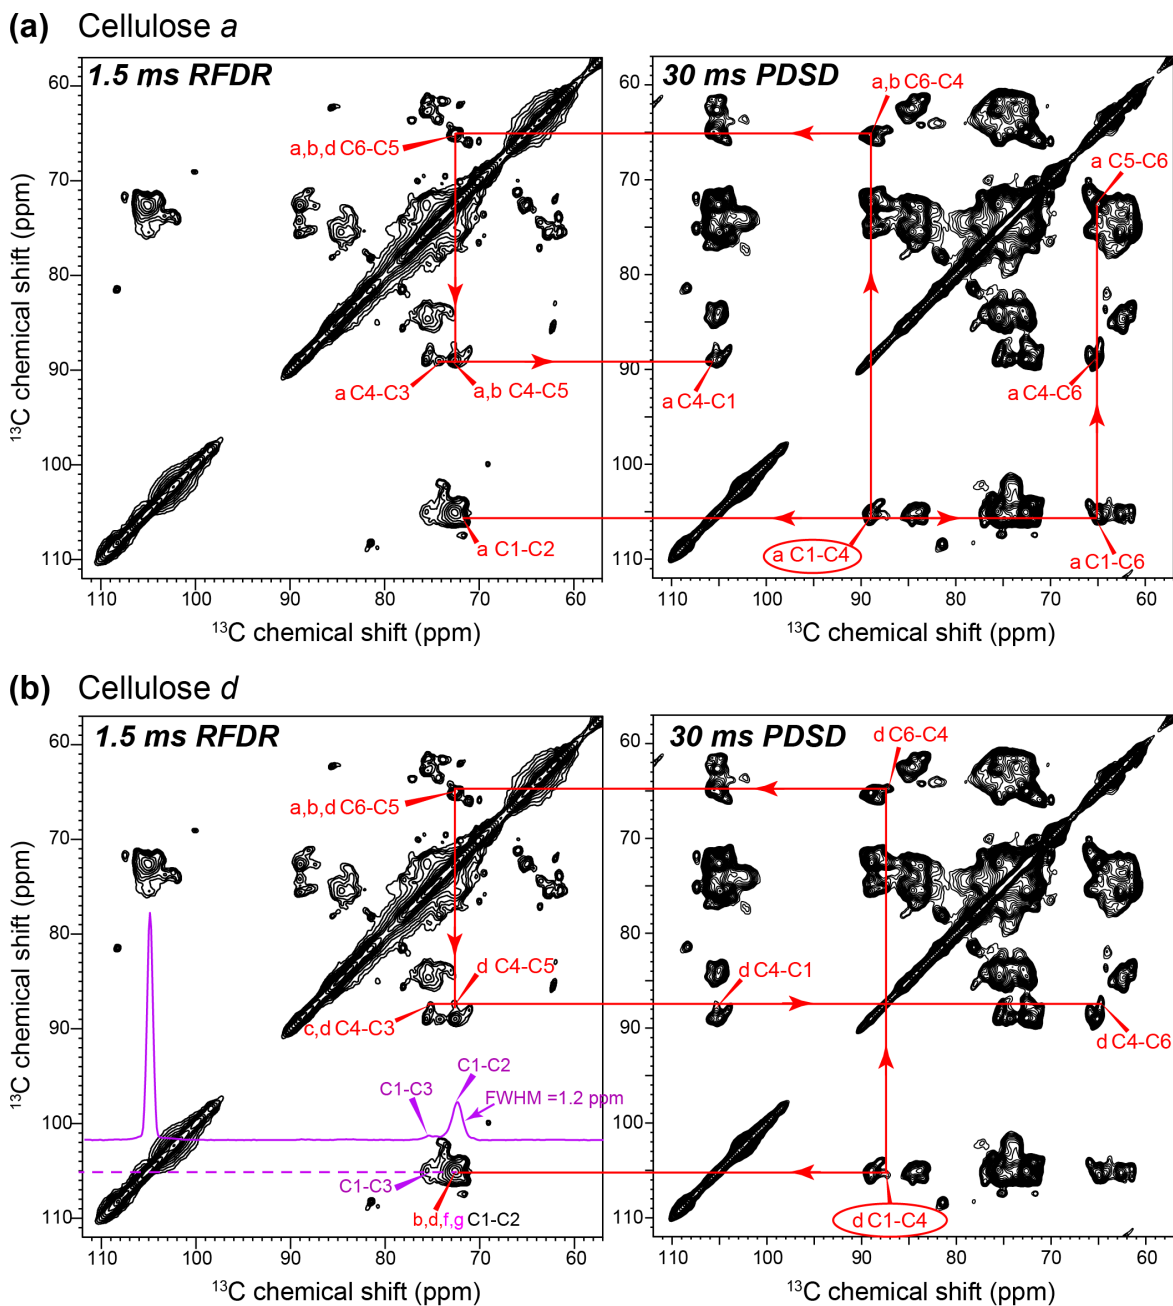

**Figure S2.** Assignment of (a) cellulose *a* and (b) cellulose *d*  $^{13}\text{C}$  chemical shifts of the *Brachypodium* cell wall using 2D RFDR and PDSM spectra. The C1-C4 cross peaks serve as the starting points for assignment.

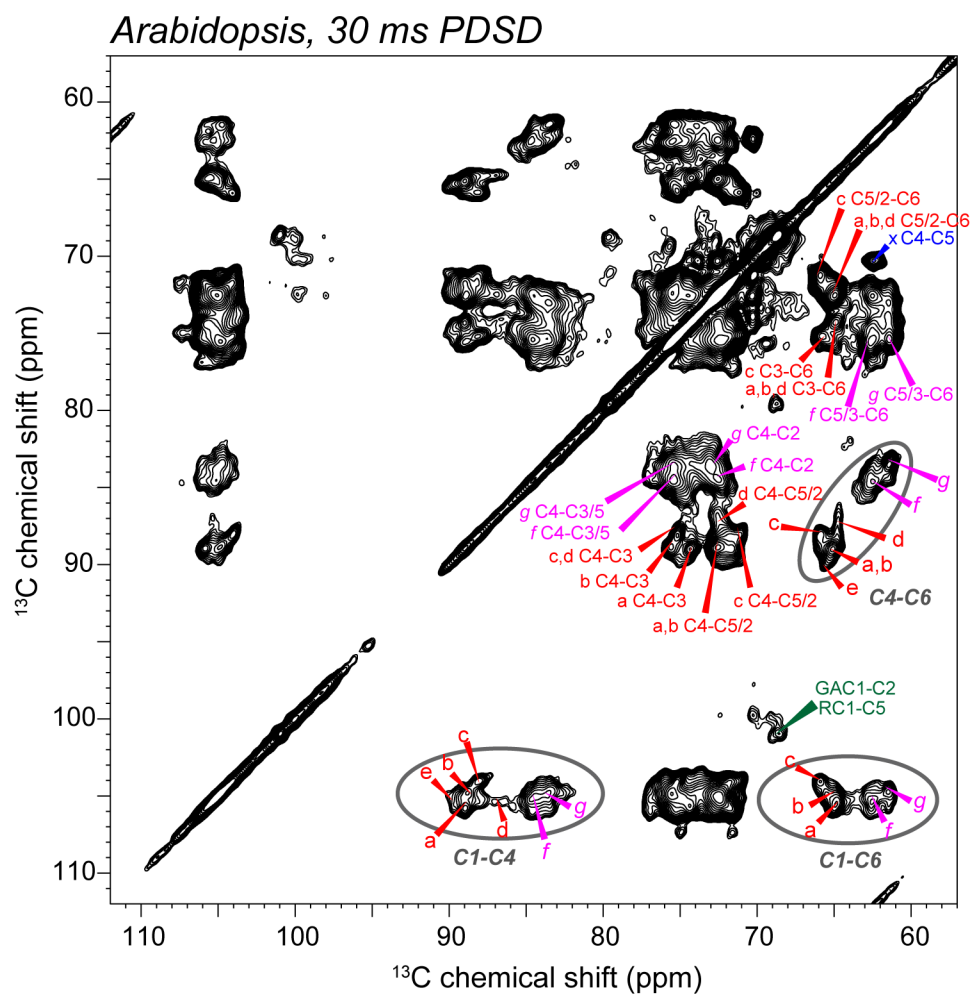

**Figure S3.** 2D  $^{13}\text{C}$ - $^{13}\text{C}$  PDSD spectrum of the *Arabidopsis* cell wall. The spectrum was measured with 30 ms mixing at 296 K on an 800 MHz spectrometer. The characteristic C1-C4, C1-C6 and C4-C6 cross peaks are highlighted.

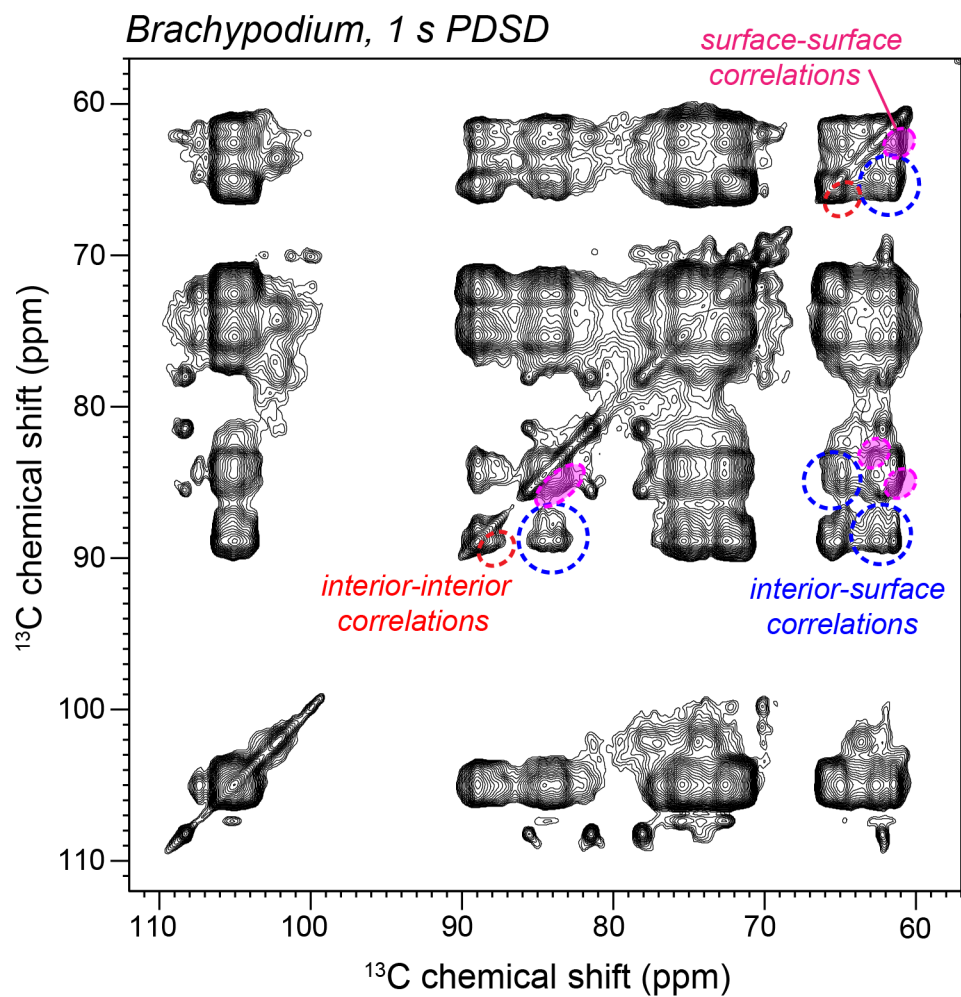

**Figure S4.** 2D PDSD spectrum of the *Brachypodium* cell wall with 1 s mixing. The spectrum was measured at 296 K on an 800 MHz spectrometer. Regions of long-range cross peaks are highlighted.

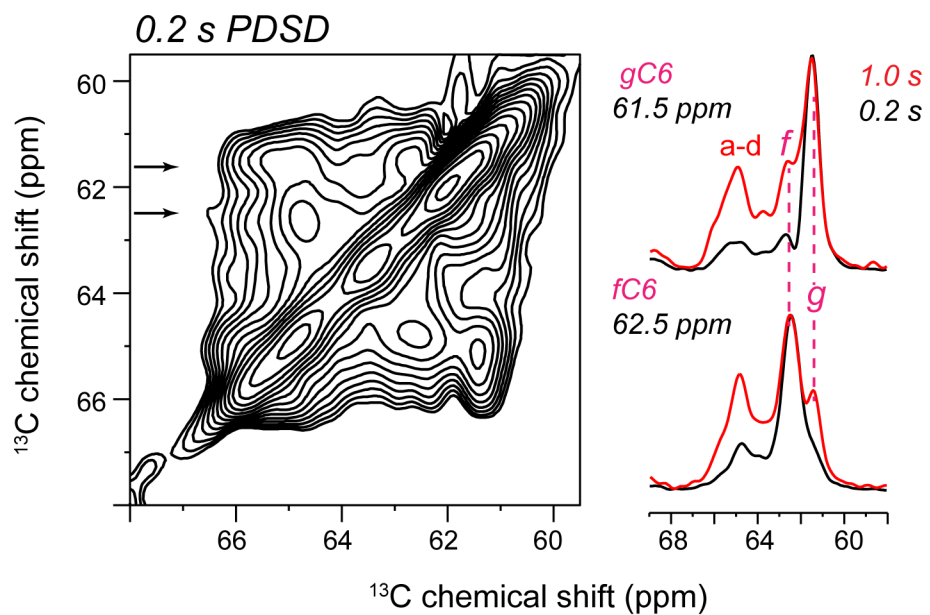

**Figure S5.** 0.2 s PDSD spectrum of the *Brachypodium* cell wall measured on an 800 MHz spectrometer. The surface-surface and surface-interior cellulose cross peaks show similar intensities.

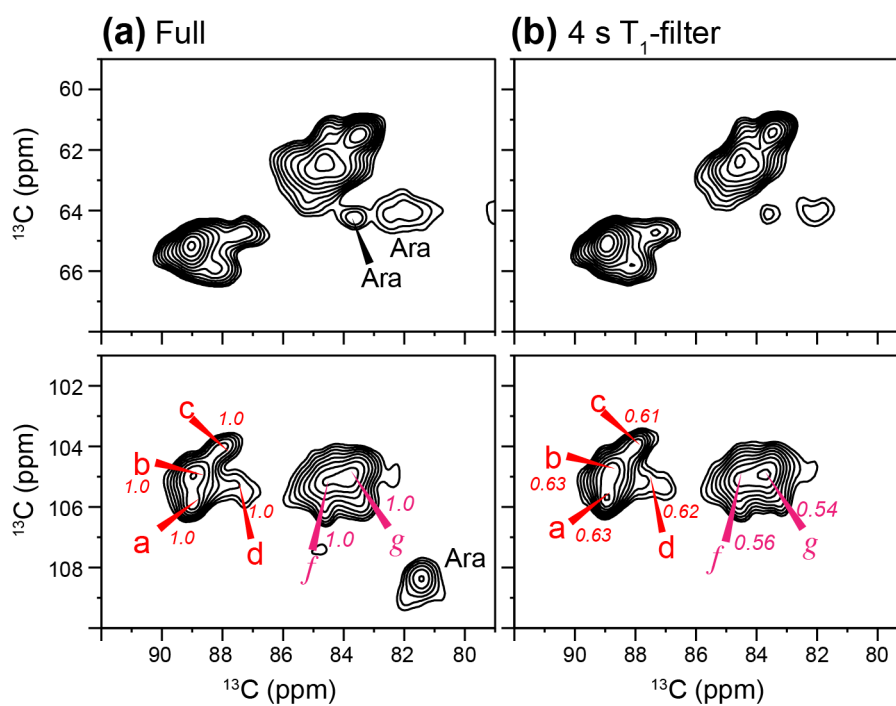

**Figure S6.** <sup>13</sup>C T<sub>1</sub> filtered 2D PDSD spectra of the *Brachypodium* primary cell wall. (a) Full 2D spectrum. (b) 2D spectrum with a 4 s T<sub>1</sub> relaxation filter. The relative intensity of each cellulose cross peak is indicated. Interior cellulose signals decay to ~62% while surface cellulose signals decay to ~55%, indicating that surface cellulose is slightly more dynamic on the nanosecond timescale.

### Supplementary References

1. Kono, H.; Numata, Y., Structural investigation of cellulose I<sub>a</sub> and I<sub>β</sub> by 2D RFDR NMR spectroscopy: determination of sequence of magnetically inequivalent D-glucose units along cellulose chain. *Cellulose* **2006**, *13*, 317-326.
